# Supplementary material for: Curcumin Ameliorates Nonalcoholic Fatty Liver Disease through Inhibition of O-GlcNAcylation
Source: Nutrients. 2019 Nov 8;11(11):2702. doi: 10.3390/nu11112702 (PMC6893521; doi:10.3390/nu11112702)
Supplement: Supplementary file 1 [file nutrients-11-02702-s001.pdf]

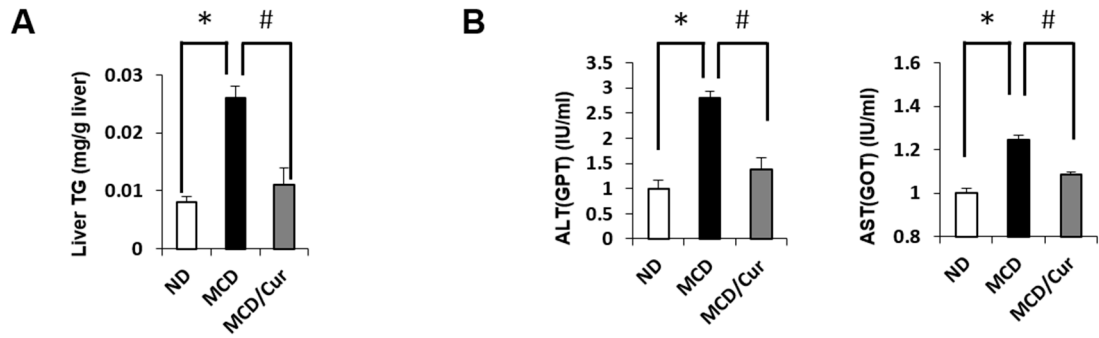

**Figure S1.** ND, MCD diet, and curcumin + MCD diet-fed mice. Mice were fed ND, MCD diet, or MCD + curcumin diet for 3 weeks. (A) Body weight and liver TG levels, and (B) serum ALT and AST levels were measured. Data are mean  $\pm$  SD ( $n = 7$ /group). \*  $p < 0.05$  vs. ND group and #  $p < 0.05$  vs. MCD group.

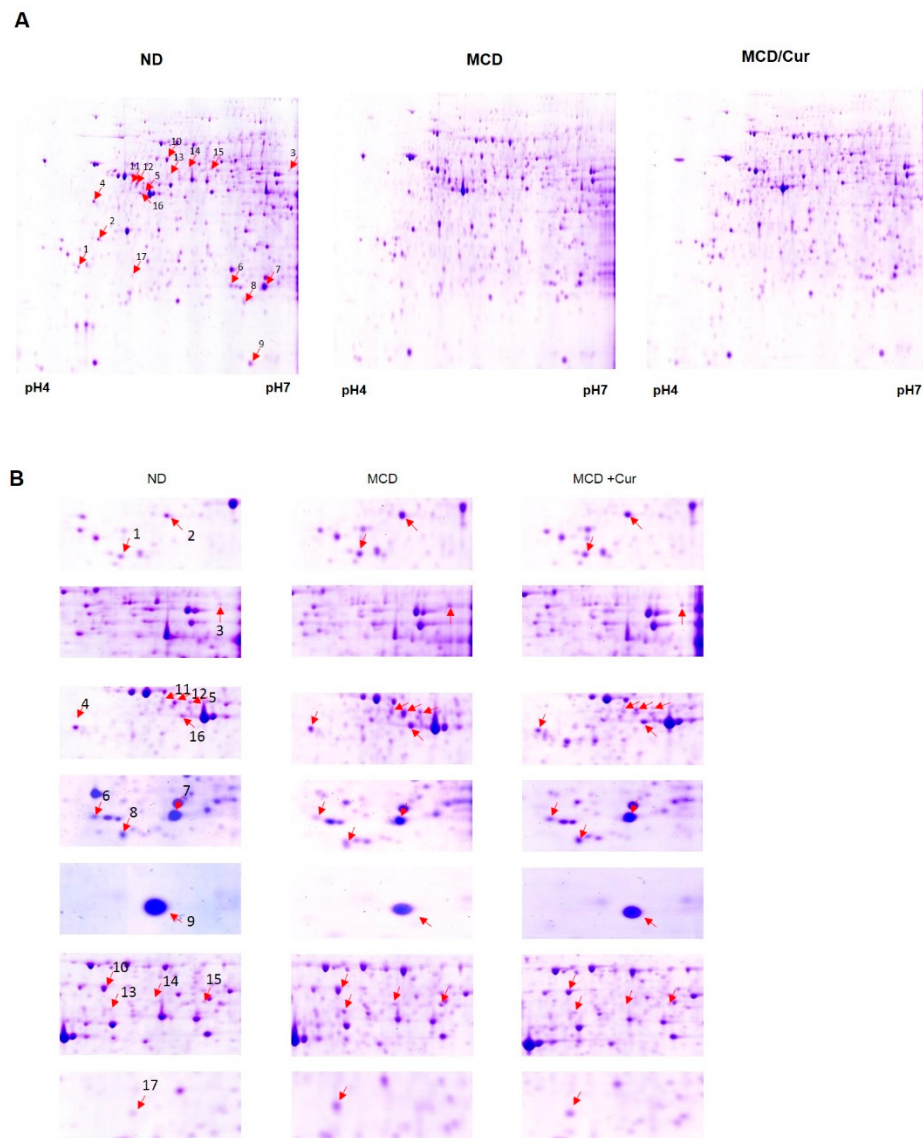

**Figure S2.** Protein expression map of mouse liver. Coomassie Blue-stained 2DE gel shows proteins derived from mice fed ND, MCD diet or MCD + curcumin diet. The proteins from mouse liver were loaded on a 24 IPG strip (pH 4–7) and then run on SDS-PAGE (12%). The protein spots significantly affected by different diet feeding are indicated by arrows. (A) and (B) The numbers on the gel correspond to the spot numbers in Table 1.

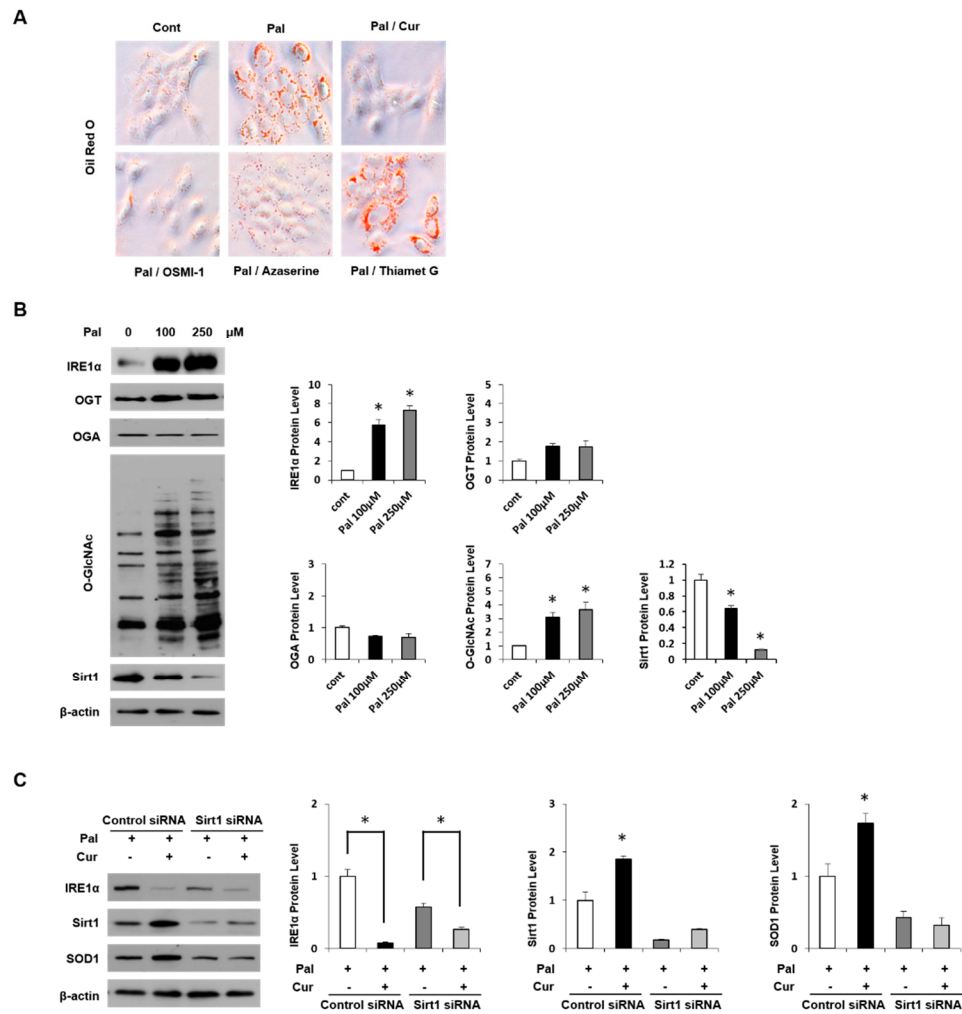

**Figure S3.** Effect of palmitate on lipid accumulation, O-glcNAcylation and SIRT1 siRNA in AML12 cells. (A) AML12 cells were either untreated or pretreated with 250  $\mu$ M palmitic acid and incubated with curcumin, OSMI-1(20  $\mu$ M), azaserine (100  $\mu$ M) or Thiamet G (200  $\mu$ M) for 12 h. Lipid accumulation in the cells was measured by Oil Red O staining. (B) The cells were not treated or pretreated with 100 or 250  $\mu$ M palmitic acid for 12h. The expression levels of O-GlcNAcylated proteins, such as IRE1 $\alpha$ , OGT, OGA, and SIRT1, were measured by immunoblot analysis. The data were presented as the means of  $\pm$  SD. Of three independent experiments. \*  $p < 0.05$ . (C) Cells were transfected with control or SIRT1 siRNA after 24h and then treated with 250  $\mu$ M palmitic acid with or without curcumin (3  $\mu$ M) for 12 h. Levels of IRE1 $\alpha$ , SIRT1, and SOD expression were measured by immunoblot analysis. Expression levels were normalized relative to  $\beta$ -actin. The data from three independent experiments were presented as the means  $\pm$  SD. \*  $p < 0.05$ .
